# Supplementary material for: Quantification of cation–anion interactions in crystalline monopotassium and monosodium glutamate salts
Source: Royal Society of Chemistry journal article supplement (doi:10.1039/c7cp05544g), 2017-01-01
Supplement: c7cp05544g1.pdf [file c7cp05544g1.pdf]

## Supporting Information for: Quantification of Cation-Anion Interactions in Crystalline Monopotassium and Monosodium Glutamate Salts

Michael T. Ruggiero<sup>ab</sup>, Juraj Sibik<sup>bc</sup>, Alessandro Erba<sup>d</sup>, J. Axel Zeitler<sup>b</sup>, and Timothy M. Korter<sup>a\*</sup>

<sup>a</sup>Department of Chemistry, Syracuse University, 1-104 Center for Science and Technology, Syracuse, NY, 13244-4100, United States of America

<sup>b</sup>Department of Chemical Engineering and Biotechnology, University of Cambridge, Philippa Fawcett Drive, Cambridge, CB3 0AS, United Kingdom

<sup>c</sup>Present address: F. Hoffmann-La Roche AG, Konzern-Hauptsitz, Grezacherstrasse, 124, 4070 Basel, Switzerland

<sup>d</sup>Dipartimento di Chimica and Centre of Excellence Nanostructured Interfaces and Surfaces, Università di Torino, via Giuria 5, 10125, Torino, Italy.

\*[tmkorter@syr.edu](mailto:tmkorter@syr.edu)

**Table S1: Experimental 90 K atomic positions in fractional coordinates of monopotassium glutamate monohydrate. The space group is  $P2_12_12$  and the lattice parameters are  $a = 7.842 \text{ \AA}$ ,  $b = 20.590 \text{ \AA}$ ,  $c = 5.143 \text{ \AA}$ , and  $\alpha = \beta = \gamma = 90^\circ$ .**

|   |         |         |         |
|---|---------|---------|---------|
| K | 0.50000 | 0.50000 | 0.01328 |
| K | 0.00000 | 0.50000 | 0.88840 |
| O | 0.27724 | 0.55393 | 0.64940 |
| O | 0.90594 | 0.62786 | 0.68520 |
| O | 0.20535 | 0.45164 | 1.27420 |
| O | 0.32095 | 0.59184 | 0.24920 |
| O | 0.83222 | 0.71591 | 0.90570 |
| N | 0.22342 | 0.67482 | 0.84350 |
| C | 0.79590 | 0.66439 | 0.78960 |
| C | 0.30080 | 0.59922 | 0.48870 |
| C | 0.50090 | 0.69042 | 0.61130 |
| C | 0.60910 | 0.64376 | 0.77320 |
| C | 0.31330 | 0.66905 | 0.59020 |
| H | 0.17200 | 0.42040 | 1.36100 |
| H | 0.22700 | 0.48470 | 1.35300 |
| H | 0.60500 | 0.59950 | 0.69500 |
| H | 0.57700 | 0.64260 | 0.95600 |
| H | 0.51100 | 0.73370 | 0.68900 |
| H | 0.53900 | 0.69270 | 0.43300 |
| H | 0.10900 | 0.66430 | 0.81600 |
| H | 0.26600 | 0.64280 | 0.98300 |
| H | 0.22900 | 0.71670 | 0.91500 |
| H | 0.25700 | 0.69730 | 0.46700 |

**Table S2: Experimental 90 K atomic positions in fractional coordinates of monosodium glutamate monohydrate. The space group is  $P2_12_12_1$  and the lattice parameters are  $a = 5.521 \text{ \AA}$ ,  $b = 15.130 \text{ \AA}$ ,  $c = 17.958 \text{ \AA}$ , and  $\alpha = \beta = \gamma = 90^\circ$ .**

|    |         |        |         |
|----|---------|--------|---------|
| Na | -0.0523 | 0.4244 | 0.1796  |
| Na | 1.067   | 0.4316 | 0.67529 |
| O  | -0.4073 | 0.4352 | 0.1037  |
| O  | 0.6625  | 0.4915 | 0.2645  |
| O  | 0.8914  | 0.3912 | 0.9858  |
| O  | 1.4584  | 0.2211 | 0.7638  |
| O  | 0.2705  | 0.4525 | 0.2556  |
| O  | 1.1459  | 0.3518 | 1.0785  |
| O  | 0.8763  | 0.348  | 0.5845  |
| O  | 1.1186  | 0.3923 | 0.4924  |
| O  | 1.4326  | 0.4371 | 0.6109  |
| O  | 1.1357  | 0.3133 | 0.7586  |
| N  | 1.7182  | 0.3225 | 0.8548  |
| N  | 0.3011  | 0.3255 | 0.3584  |
| C  | 1.4817  | 0.3593 | 0.8278  |
| C  | 0.482   | 0.4442 | 0.2814  |
| C  | 0.5309  | 0.3698 | 0.3366  |
| C  | 1.27    | 0.3258 | 0.9518  |
| C  | 0.674   | 0.4013 | 0.4044  |
| C  | 1.35    | 0.2912 | 0.7793  |
| C  | 1.33    | 0.3949 | 0.893   |
| C  | 1.091   | 0.3588 | 1.0102  |
| C  | 0.739   | 0.3294 | 0.4589  |
| C  | 0.929   | 0.3599 | 0.5164  |
| H  | 1.403   | 0.307  | 0.978   |
| H  | 1.206   | 0.266  | 0.924   |
| H  | 1.167   | 0.418  | 0.871   |
| H  | 1.399   | 0.441  | 0.916   |
| H  | 1.81    | 0.348  | 0.902   |
| H  | 1.846   | 0.325  | 0.814   |
| H  | 1.699   | 0.27   | 0.866   |
| H  | -0.29   | 0.418  | 0.058   |
| H  | -0.51   | 0.418  | 0.092   |
| H  | 0.31    | 0.246  | 0.376   |
| H  | 0.242   | 0.36   | 0.394   |
| H  | 0.813   | 0.283  | 0.435   |
| H  | 0.583   | 0.307  | 0.485   |
| H  | 0.815   | 0.436  | 0.386   |
| H  | 0.589   | 0.451  | 0.429   |
| H  | 0.634   | 0.325  | 0.307   |
| H  | 1.561   | 0.413  | 0.606   |
| H  | 1.34    | 0.429  | 0.574   |
| H  | 1.508   | 0.41   | 0.794   |
| H  | 0.207   | 0.319  | 0.323   |
